# Supplementary material for: Comprehensive Investigation of Moringa oleifera from Different Regions by Simultaneous Determination of 11 Polyphenols Using UPLC-ESI-MS/MS
Source: PubMed Central journal article supplement (PMC7037984; doi:10.3390/molecules25030676), 2020-02-05
Supplement: molecules-25-00676-s001.pdf [file molecules-25-00676-s001.pdf]

## SUPPLEMENTARY MATERIALS

### **Comprehensive Investigation of *Moringa oleifera* from Different Regions by Simultaneous Determination of 11 Polyphenols Using UPLC-ESI-MS/MS**

**Yanqin Zhu<sup>1,2</sup>, Qinhong Yin<sup>3</sup> and Yaling Yang<sup>1,\*</sup>**

<sup>1</sup> Faculty of Life Science and Technology, Kunming University of Science and Technology, Kunming 650500, Yunnan, China

<sup>2</sup> Research Center for Analysis and Measurement, Kunming University of Science and Technology, Kunming 650093, China

<sup>3</sup> Yunnan Police College, Kunming 650223, China

\* Correspondence: ygs2013@yeah.net; Tel.: +86-871-65113971

## SUPPLEMENTARY MATERIALS CONTENT

**Figure S1.** Precursors of 11 polyphenols in TQD MS (a: gallic acid, b: chlorogenic acid, c: vanillina, d: ferulic acid, e: gallogen, f: rutin, g: isoquercetin, h: quercitrin, i: baicalin, j: quercetin and k: kaempferide).

**Figure S2.** The effect of extraction solvents, extraction method, extraction time and temperature in the extraction procedure (a: extraction solvents, b: extraction method, c: extraction time, d: temperature).

**Table S1.** Matrix effects and their precision (RSD) of the proposed method in *Moringa oleifera* leaves matrices spiked at 0.5  $\mu\text{g}/\text{mL}$  level.

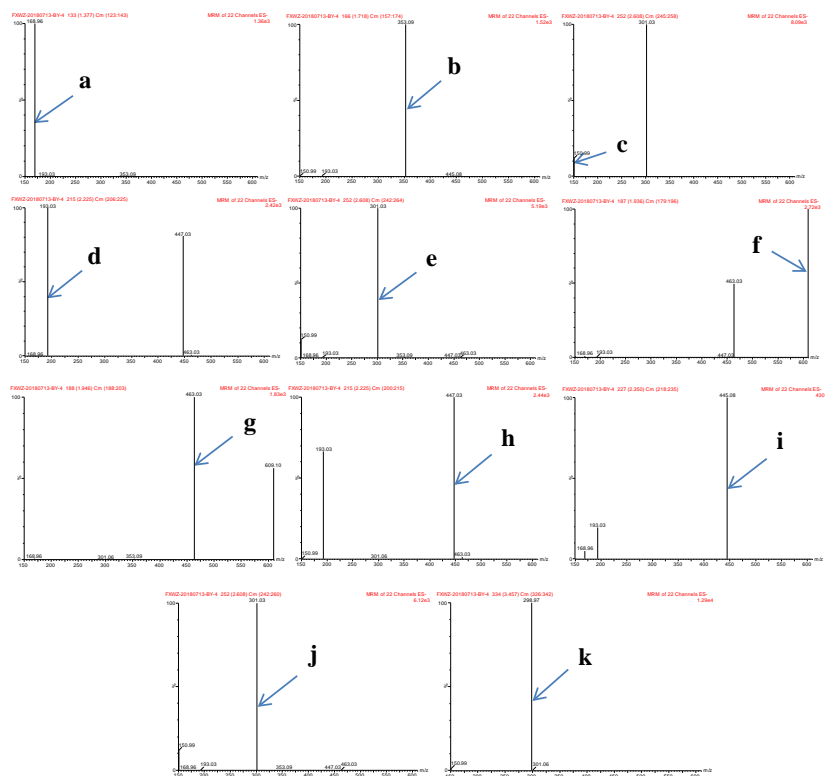

**Figure S1.** Precursors of 11 polyphenols in TQD MS (a: gallic acid, b: chlorogenic acid, c: vanillina, d: ferulic acid, e: gallogen, f: rutin, g: isoquercetin, h: quercitrin, i: baicalin, j: quercetin and k: kaempferide).

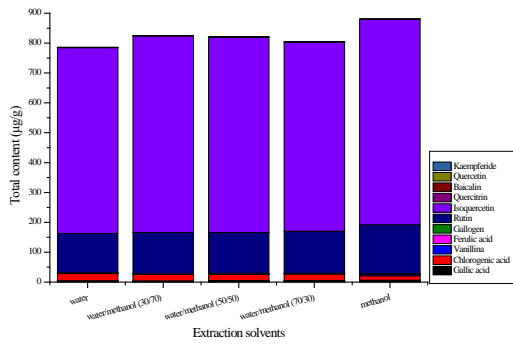

(a)

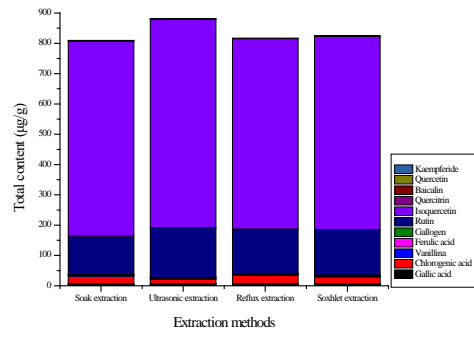

(b)

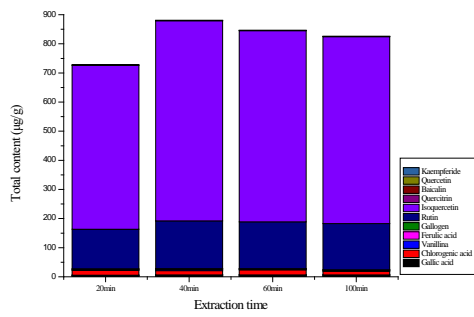

(c)

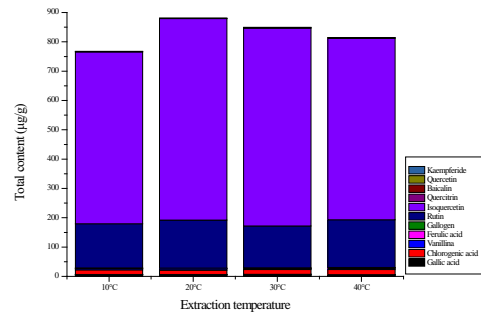

(d)

**Figure S2.** The effect of extraction solvents, extraction method, extraction time and temperature in the extraction procedure (a: extraction solvents, b: extraction method, c: extraction time, d: temperature).

**Table S1**

Matrix effects and their precision (RSD) of the proposed method in *Moringa oleifera* leaves matrices spiked at 0.5 µg/mL level.

| Compound Name    | Moringa Leaves    |         |
|------------------|-------------------|---------|
|                  | Matrix Effect (%) | RSD (%) |
| Gallic acid      | 92.3              | 4.1     |
| Chlorogenic acid | 96.0              | 3.5     |
| Vanillin         | 96.5              | 4.8     |
| Ferulic acid     | 92.3              | 3.2     |
| Gallogen         | 93.8              | 3.5     |
| Rutin            | 88.9              | 3.0     |
| Isoquercetin     | 97.2              | 4.0     |
| Quercitrin       | 93.2              | 1.7     |
| Baicalin         | 97.8              | 2.3     |
| Quercetin        | 94.4              | 2.8     |
| Kaempferide      | 90.7              | 3.9     |
